# Supplementary material for: Genome-wide identification and expression analysis of LBD transcription factor genes in Moso bamboo (Phyllostachys edulis)
Source: PubMed Central journal article supplement (PMC8240294; doi:10.1186/s12870-021-03078-3), 2021-06-28
Supplement: 12870_2021_3078_MOESM3_ESM.pdf [file 12870_2021_3078_MOESM3_ESM.pdf]

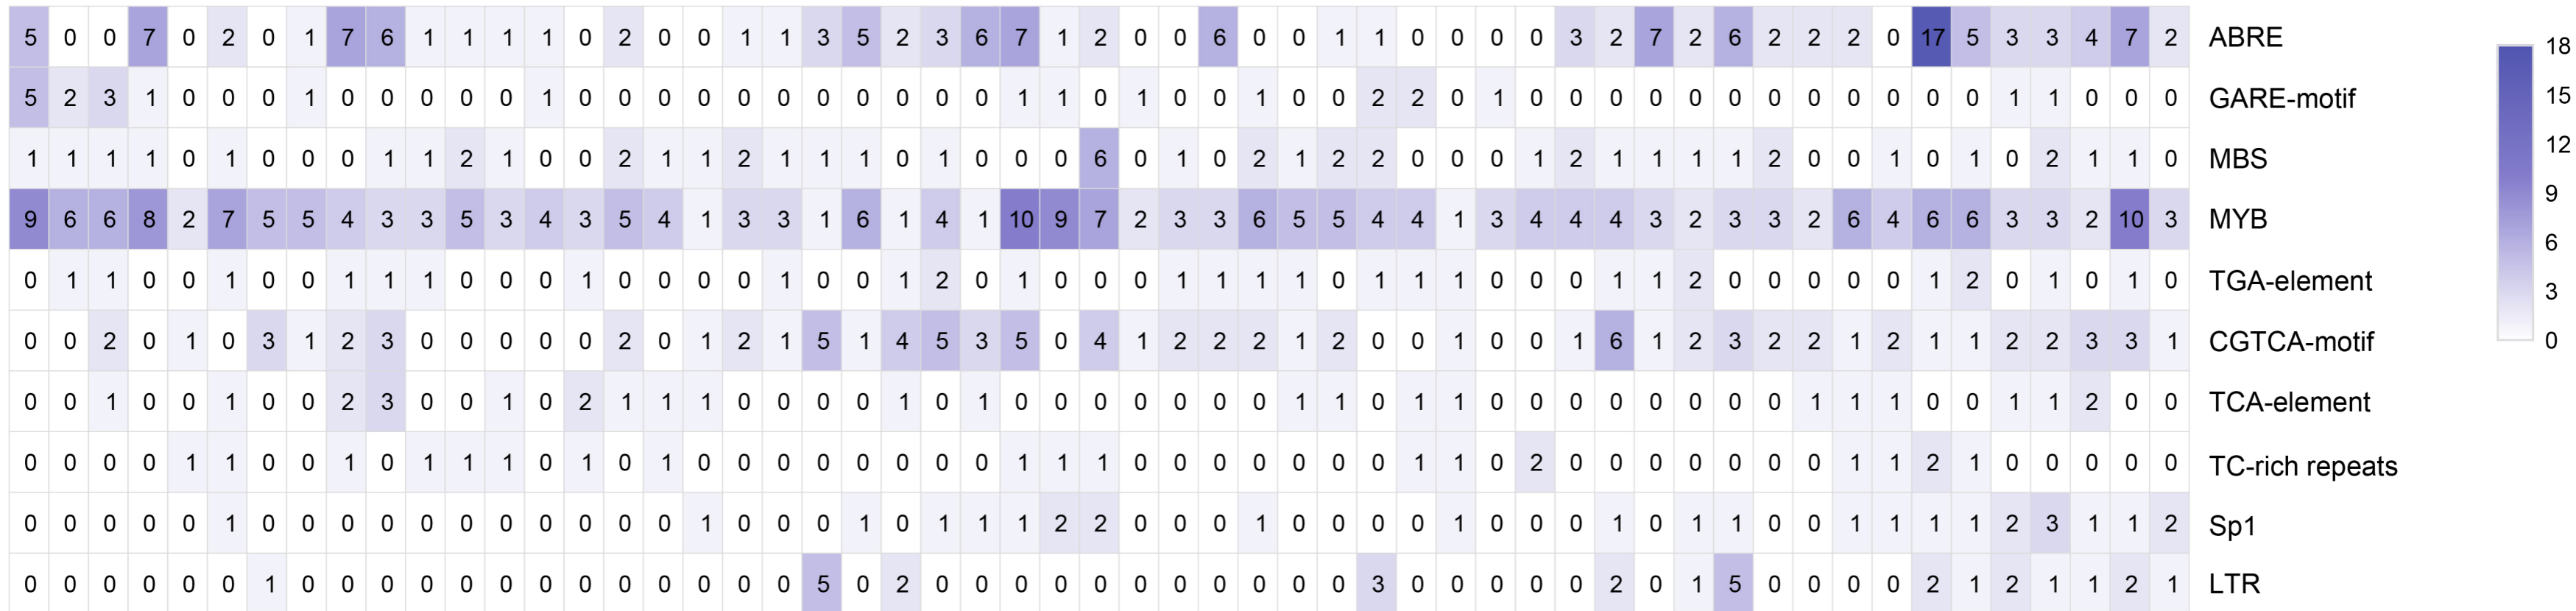

PeLBD05  
 PeLBD08  
 PeLBD12  
 PeLBD15  
 PeLBD13  
 PeLBD07  
 PeLBD43  
 PeLBD23  
 PeLBD36  
 PeLBD34  
 PeLBD46  
 PeLBD26  
 PeLBD39  
 PeLBD04  
 PeLBD47  
 PeLBD09  
 PeLBD24  
 PeLBD35  
 PeLBD06  
 PeLBD42  
 PeLBD50  
 PeLBD30  
 PeLBD44  
 PeLBD45  
 PeLBD17  
 PeLBD54  
 PeLBD22  
 PeLBD37  
 PeLBD03  
 PeLBD19  
 PeLBD31  
 PeLBD41  
 PeLBD33  
 PeLBD52  
 PeLBD32  
 PeLBD51  
 PeLBD16  
 PeLBD01  
 PeLBD53  
 PeLBD25  
 PeLBD21  
 PeLBD14  
 PeLBD18  
 PeLBD55  
 PeLBD27  
 PeLBD40  
 PeLBD10  
 PeLBD20  
 PeLBD38  
 PeLBD28  
 PeLBD48  
 PeLBD02  
 PeLBD11  
 PeLBD29  
 PeLBD49
