# Supplementary material for: Genome-wide identification and expression analysis of LBD transcription factor genes in Moso bamboo (Phyllostachys edulis)
Source: PubMed Central journal article supplement (PMC8240294; doi:10.1186/s12870-021-03078-3), 2021-06-28

# KEGG pathway anotation

- Metabolism
- Genetic Information Processing
- Environmental Information Processing
- Cellular Processes
- Organismal Systems
- Human Diseases

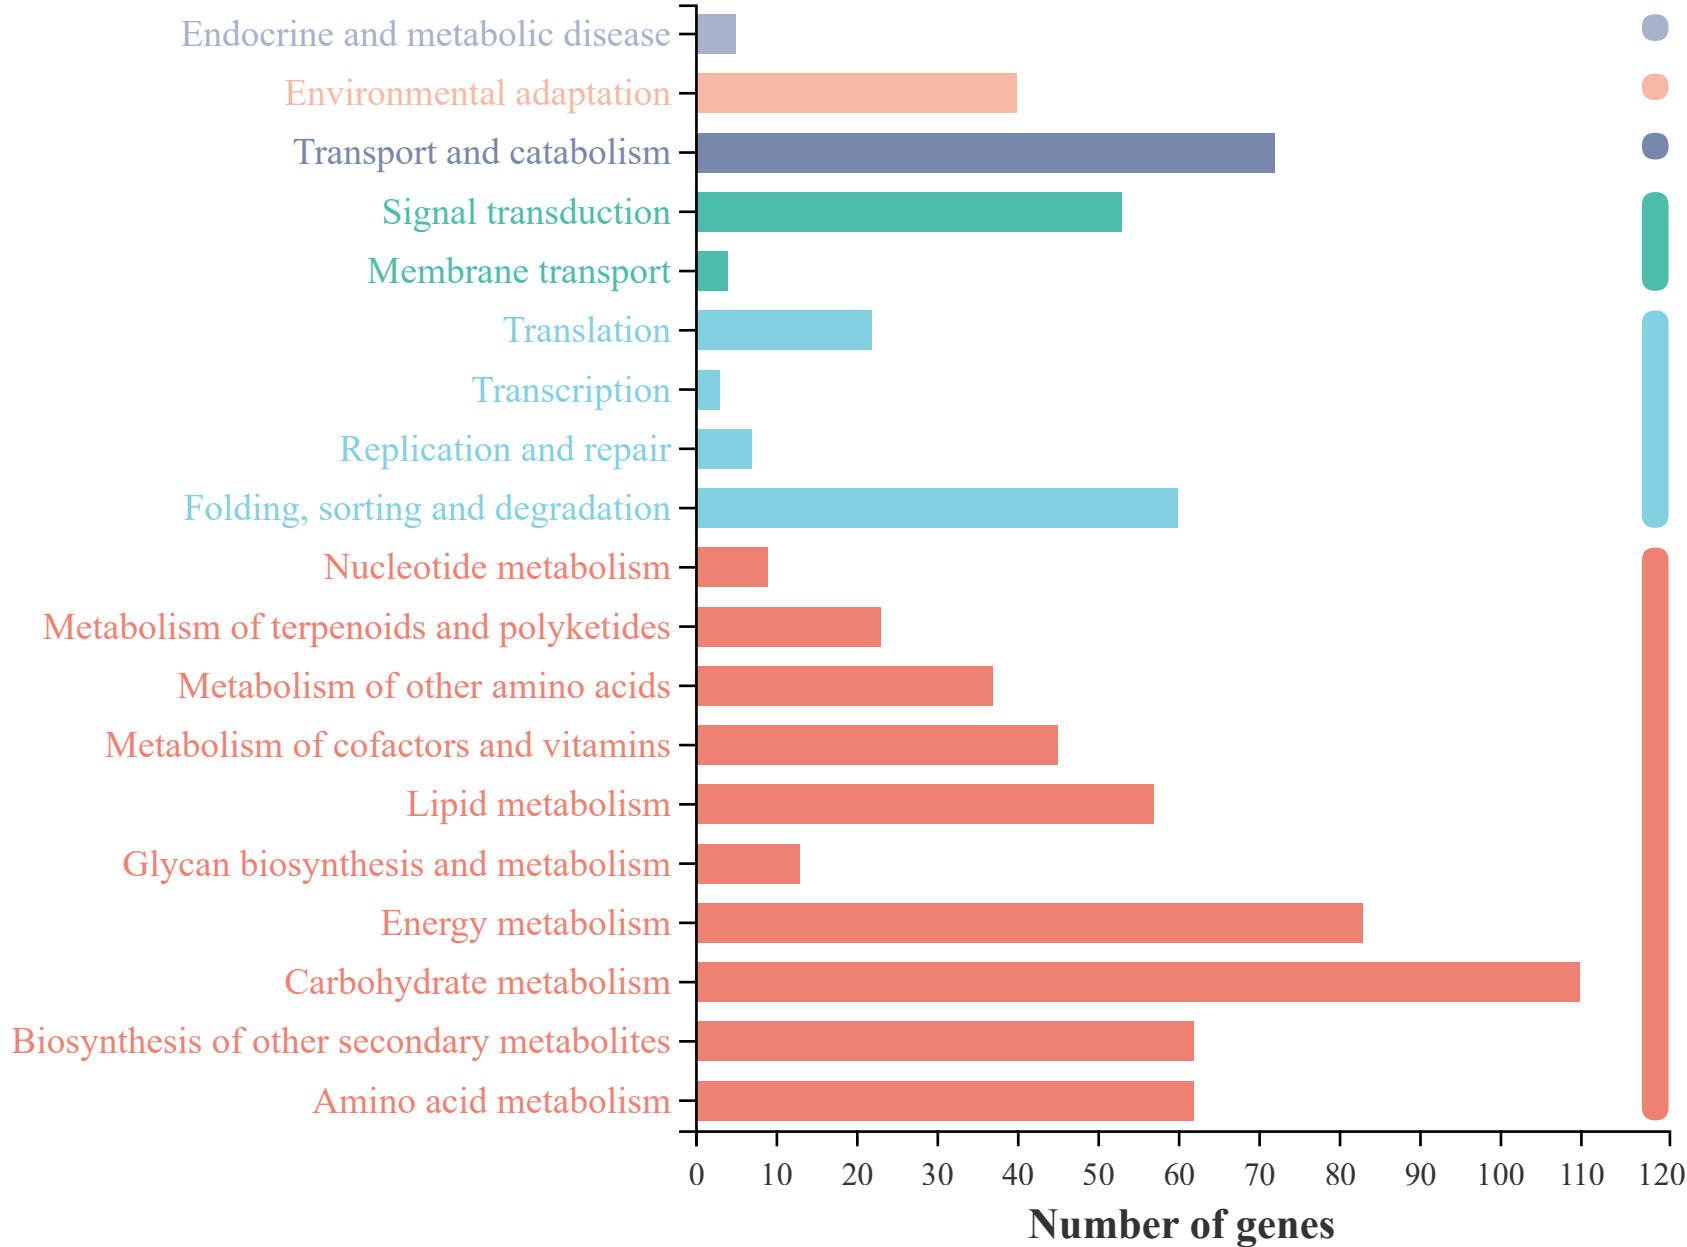

Supplement: 12870_2021_3078_MOESM6_ESM.pdf [file 12870_2021_3078_MOESM6_ESM.pdf]
